# Supplementary material for: Life Cycle Cost Analysis for Scotland Short-Sea Ferries
Source: MDPI journal article supplement (doi:10.3390/jmse11020424), 2023-02-15

## Results of LCCA for 27 ships with the proposed 10 propulsion types (Minimum value)

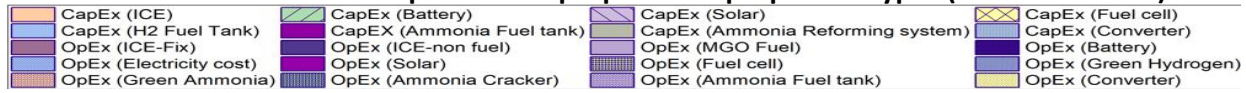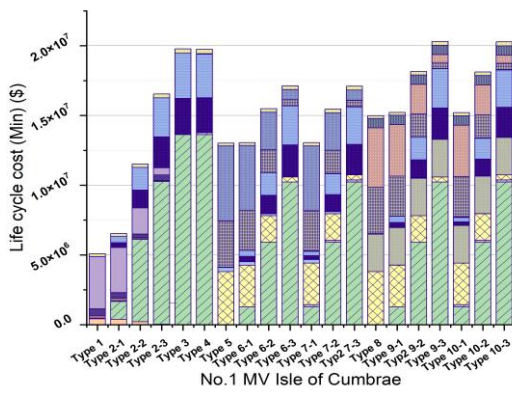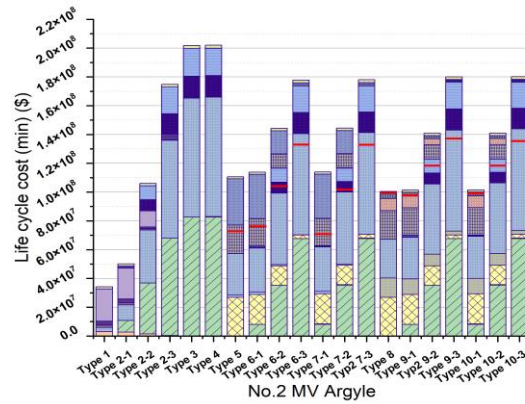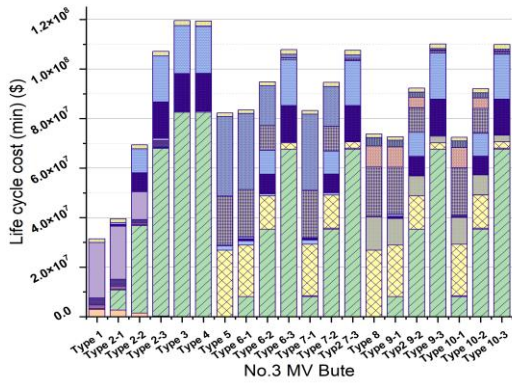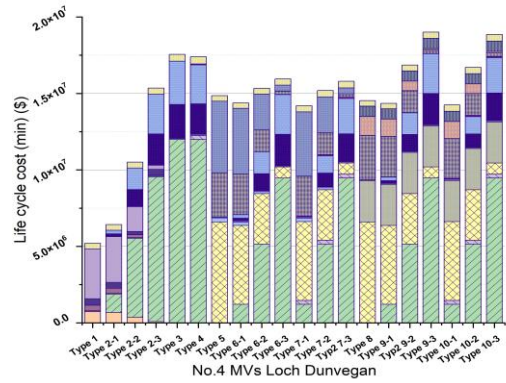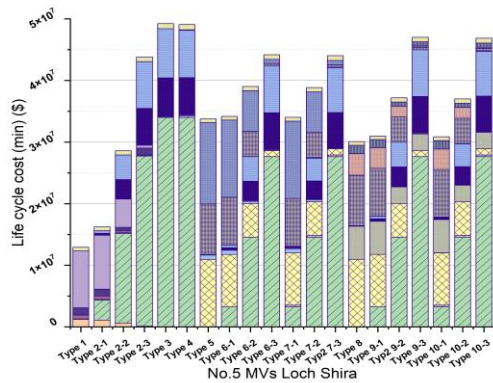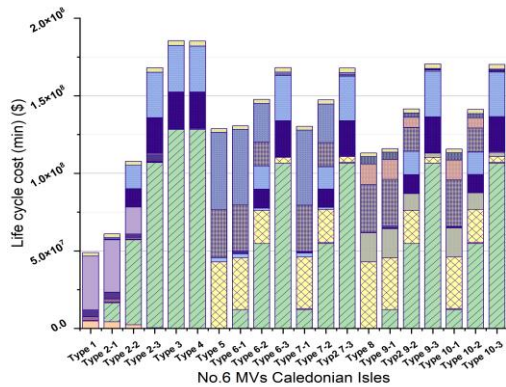

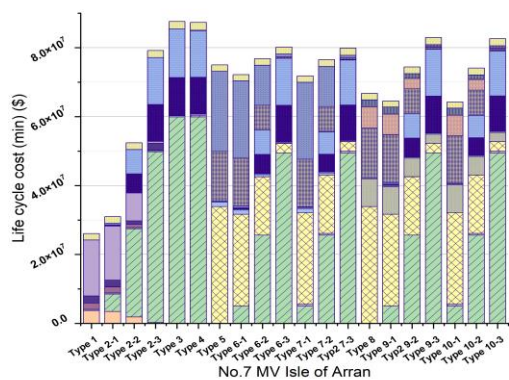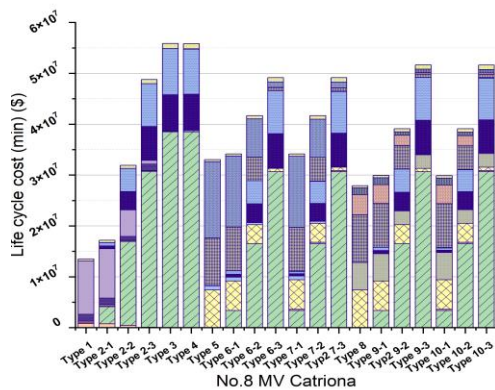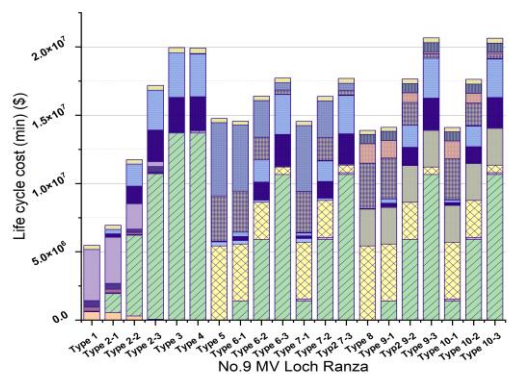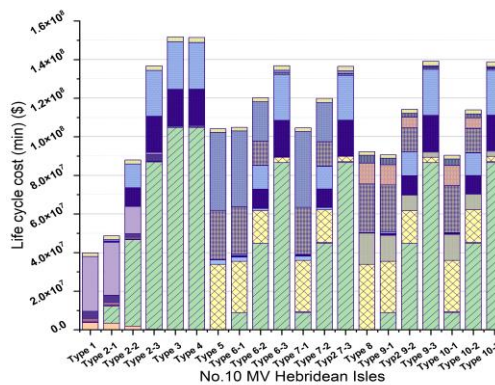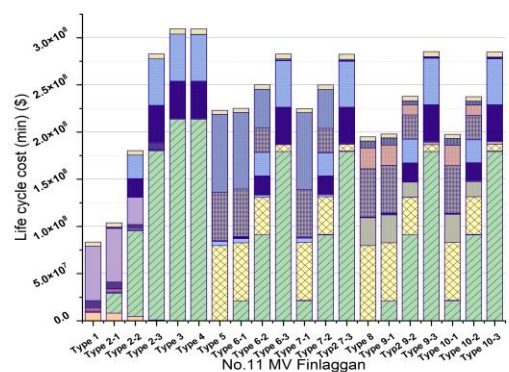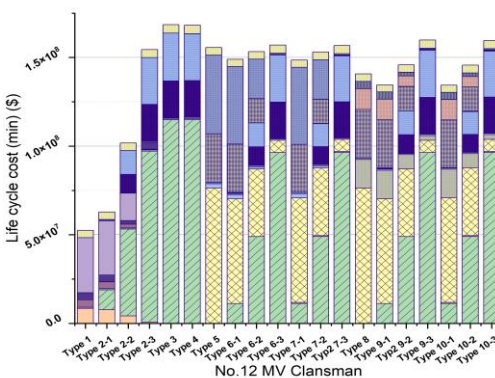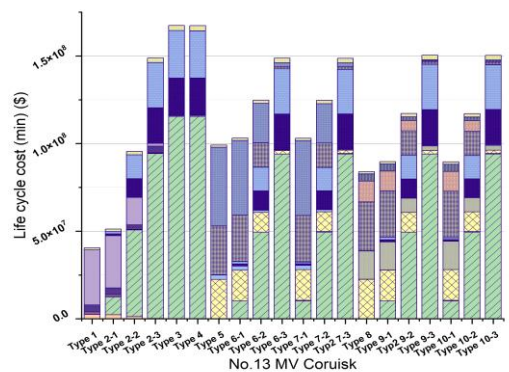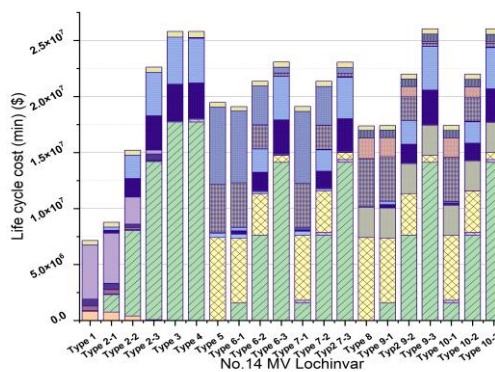



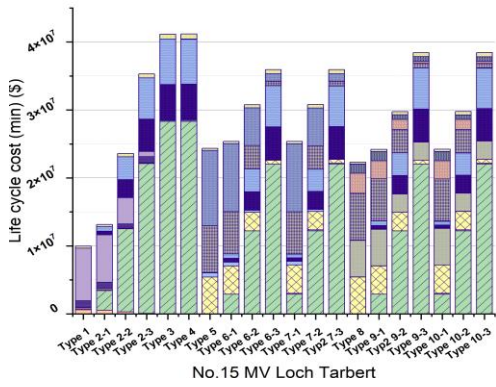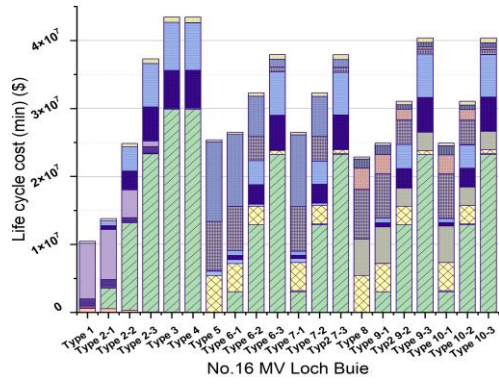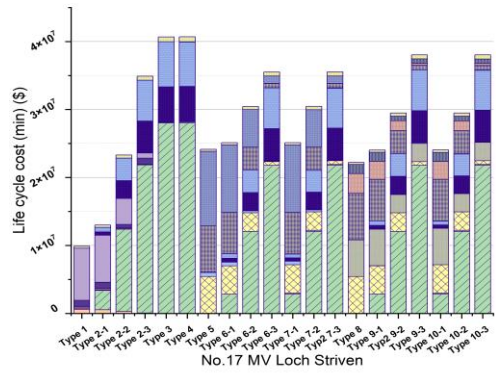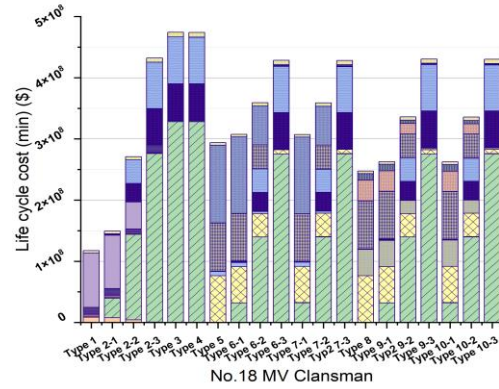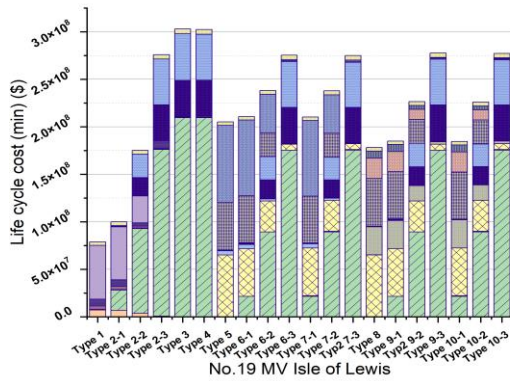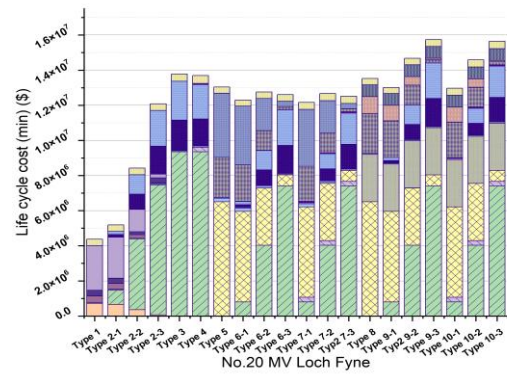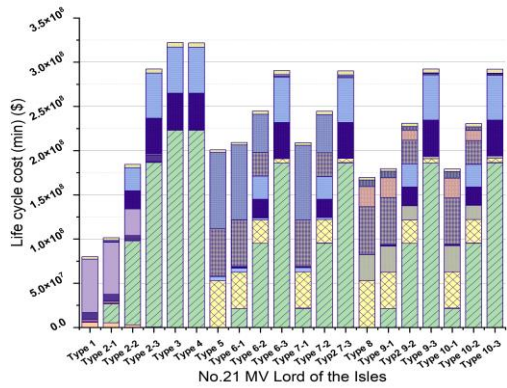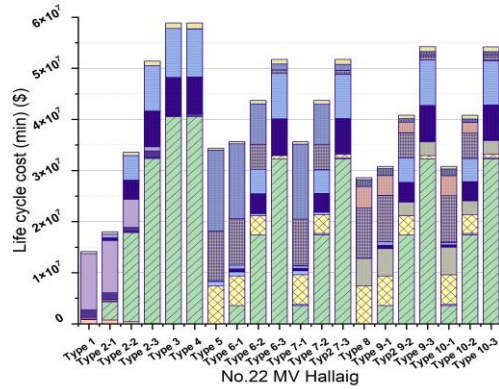

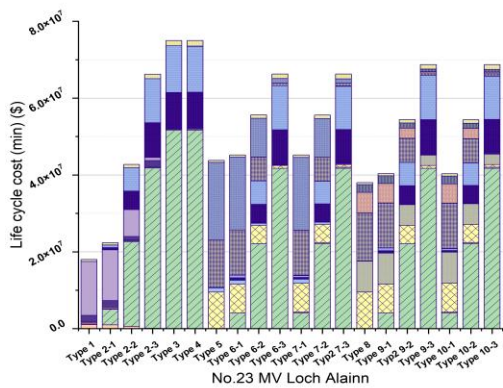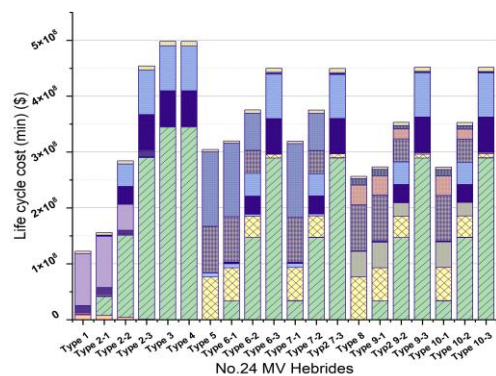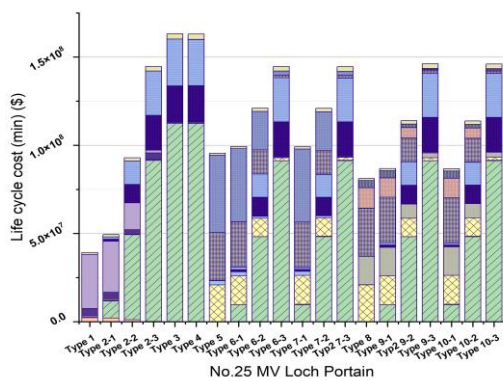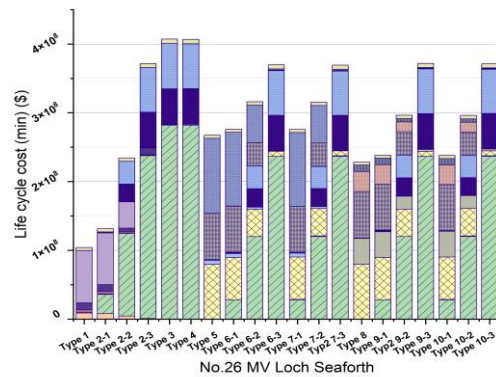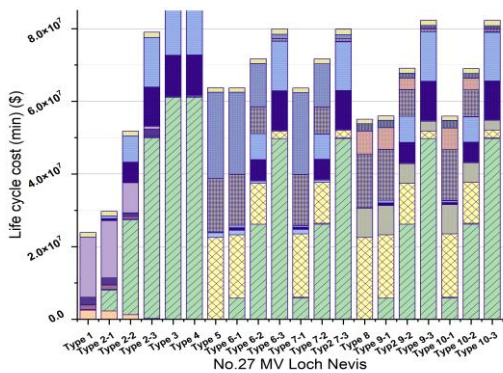



## Results of LCCA for 27 ships with the proposed 10 propulsion types (Average value)

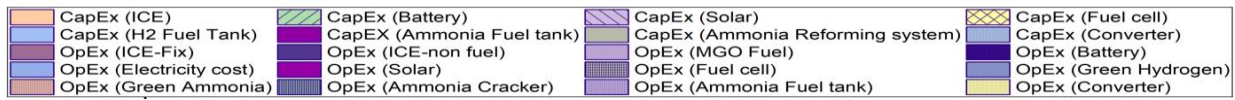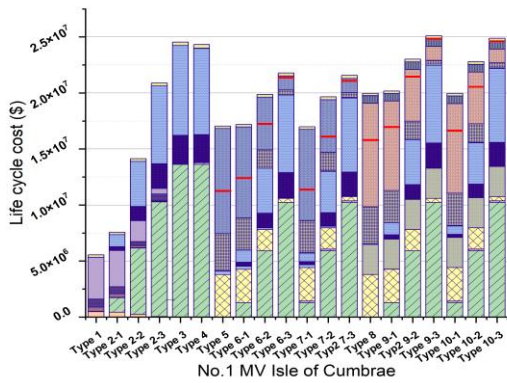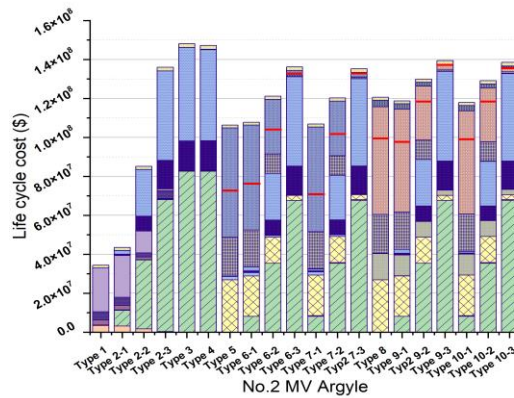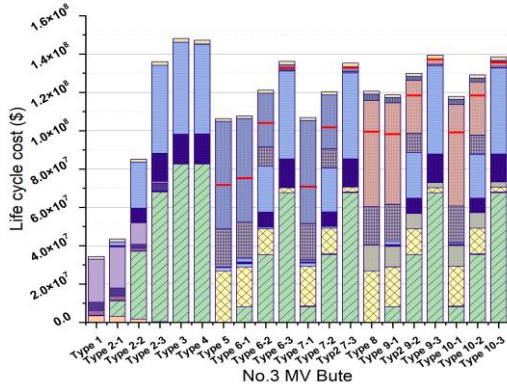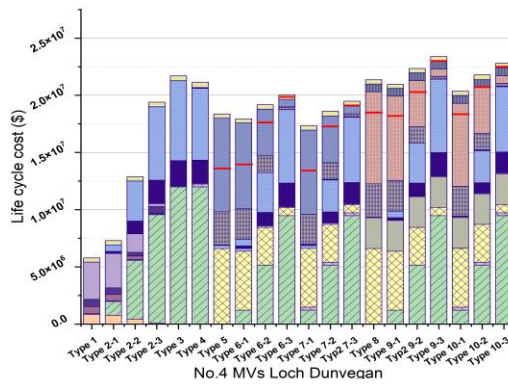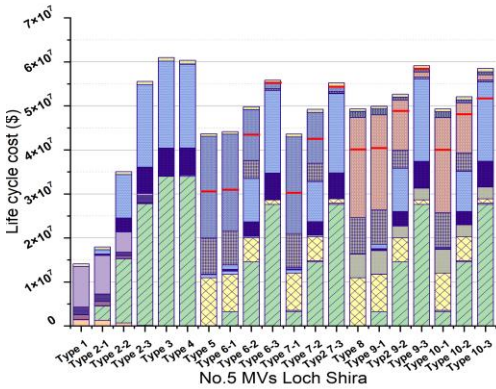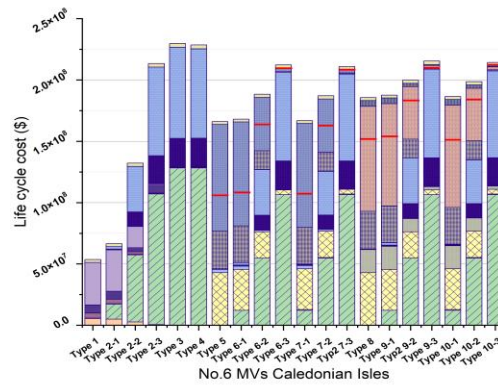

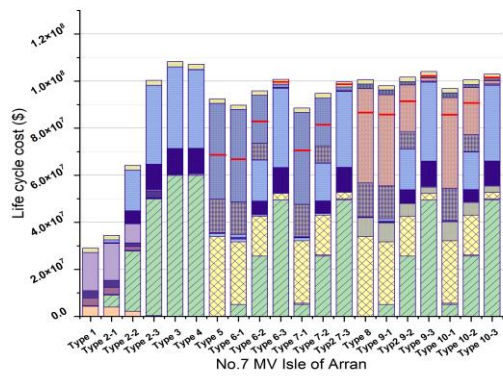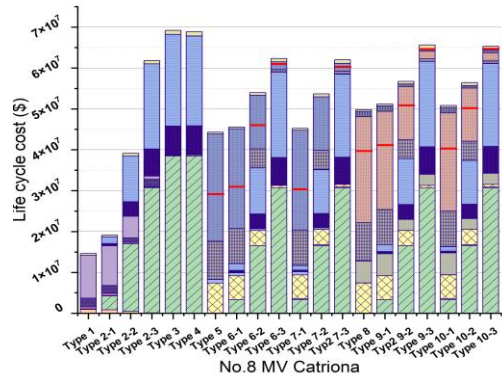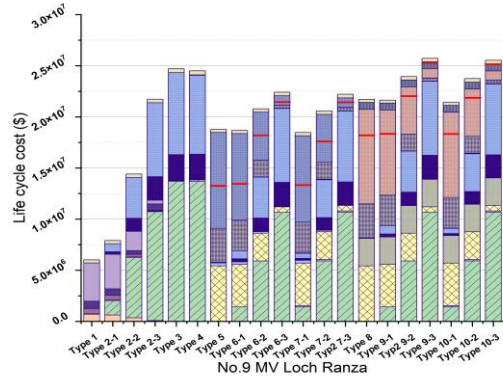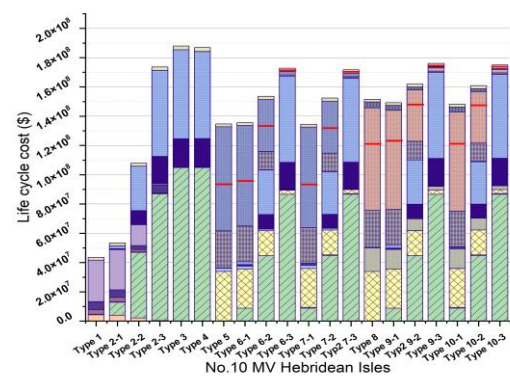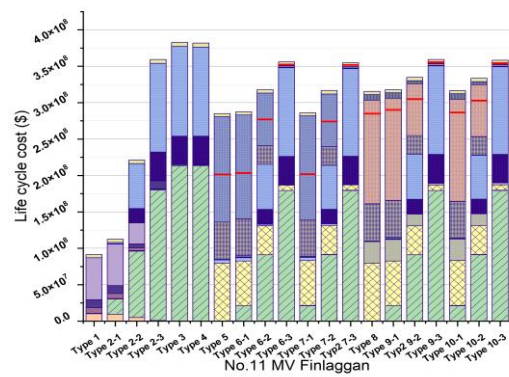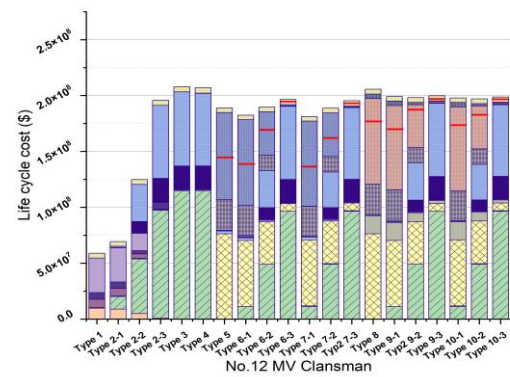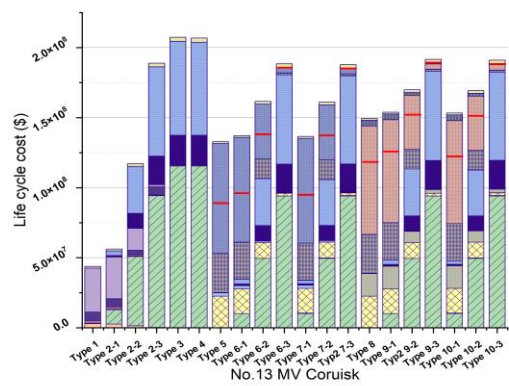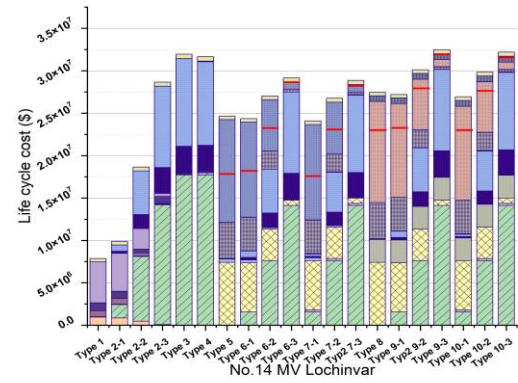



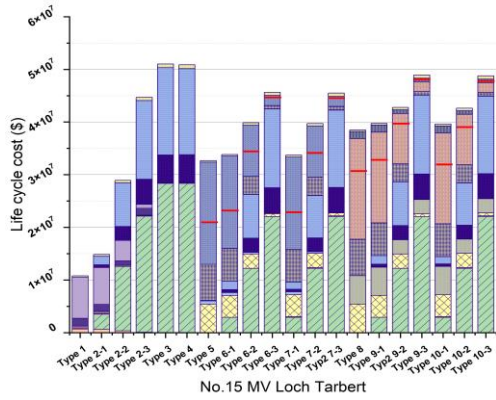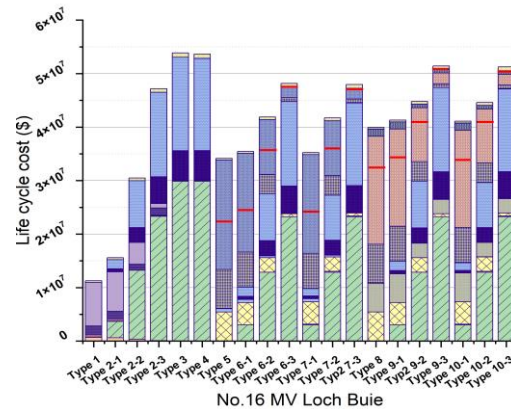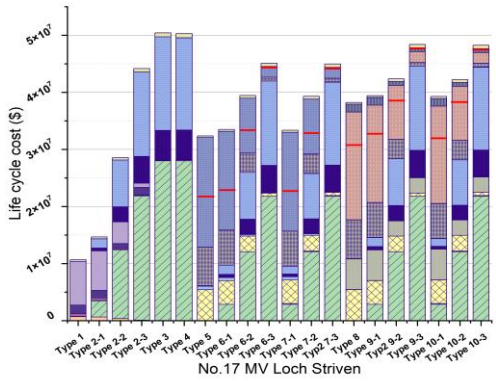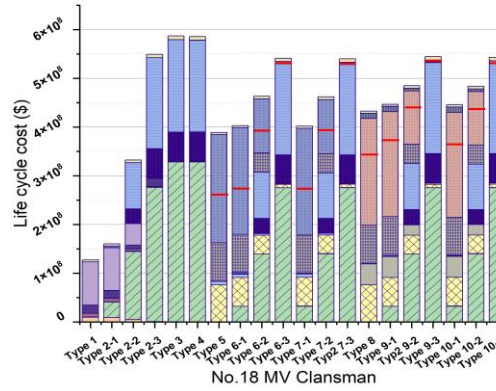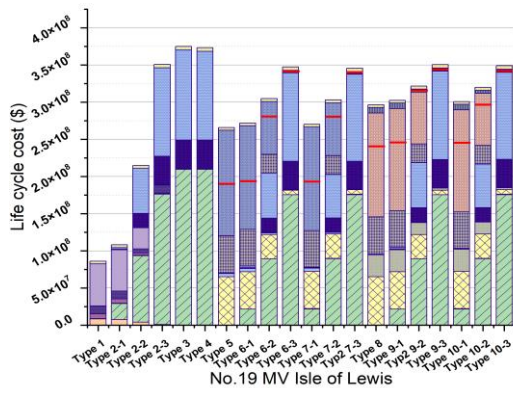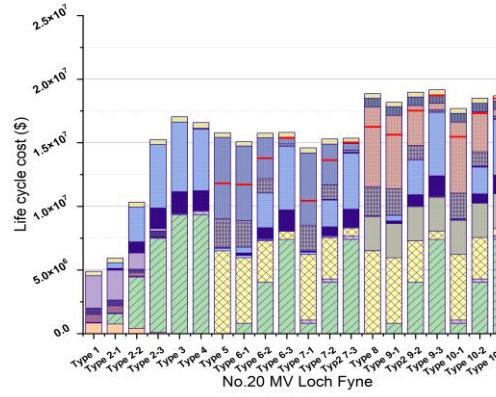

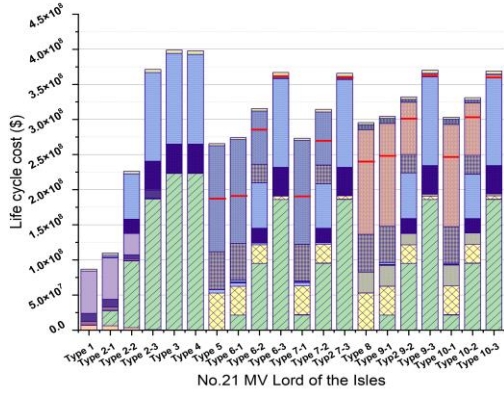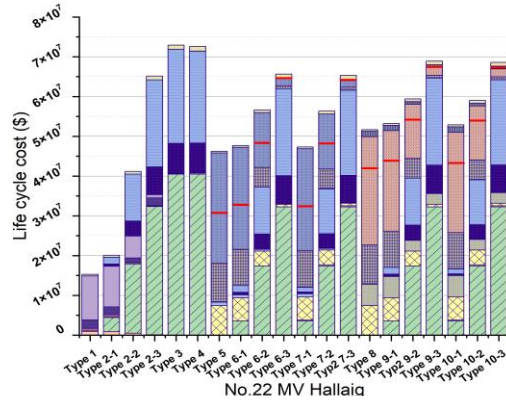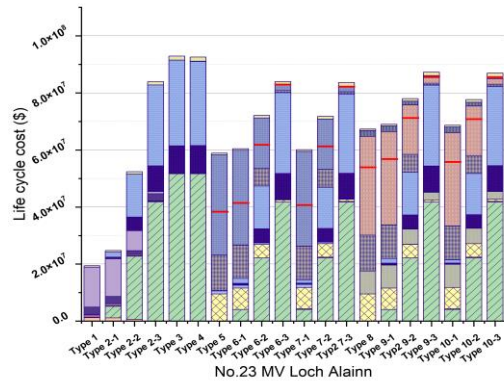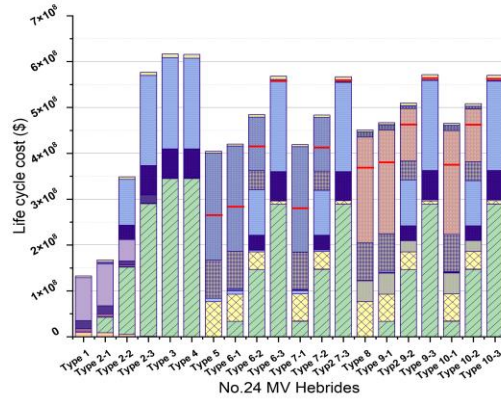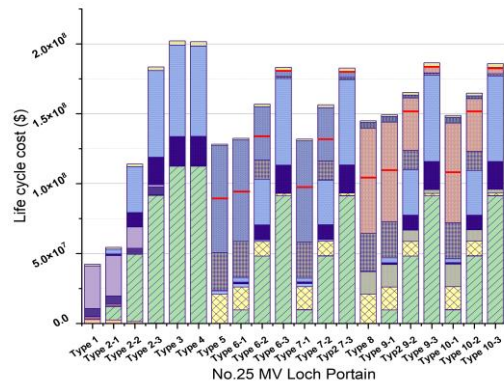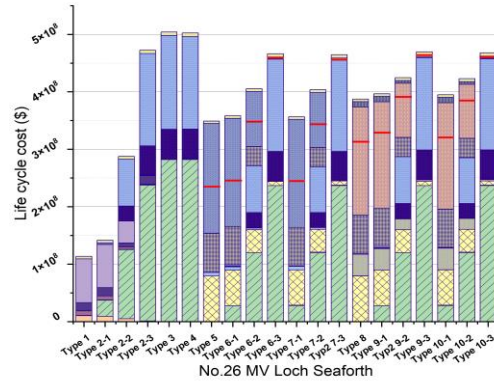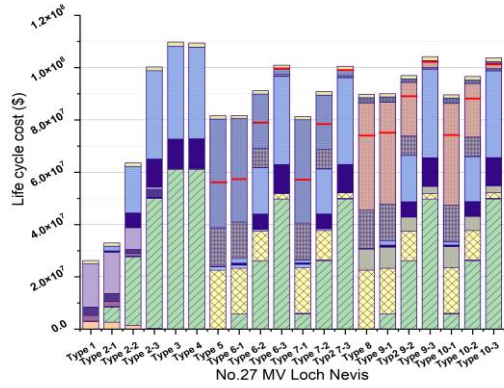



## Results of LCCA for 27 ships with the proposed 10 propulsion types (Maximum value)

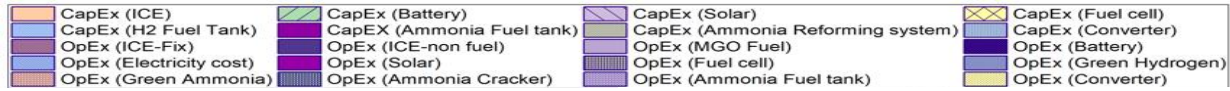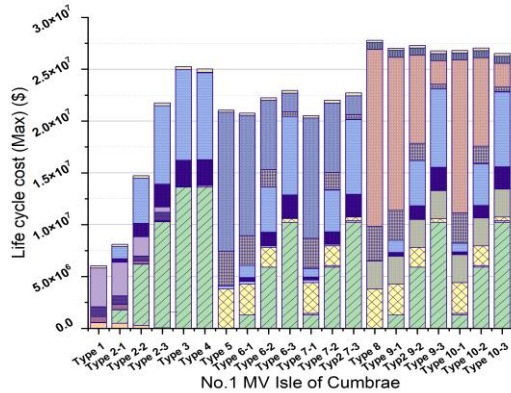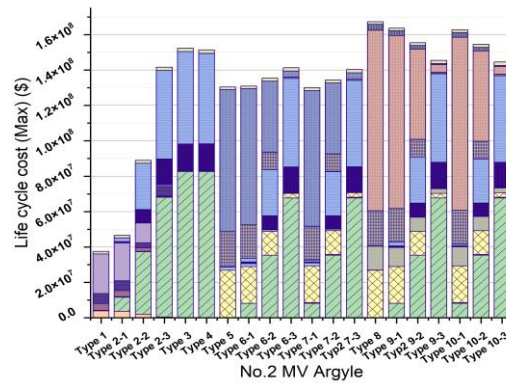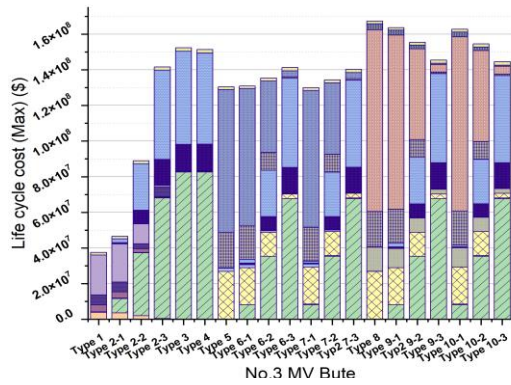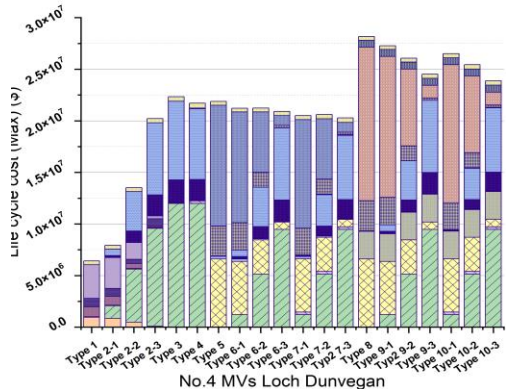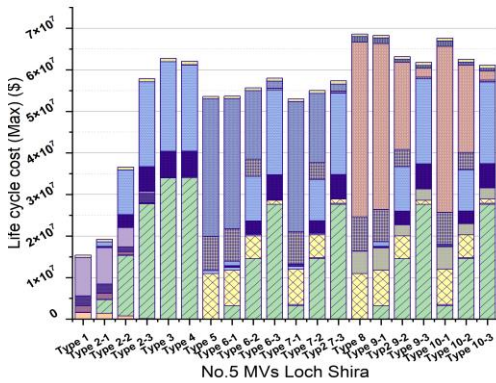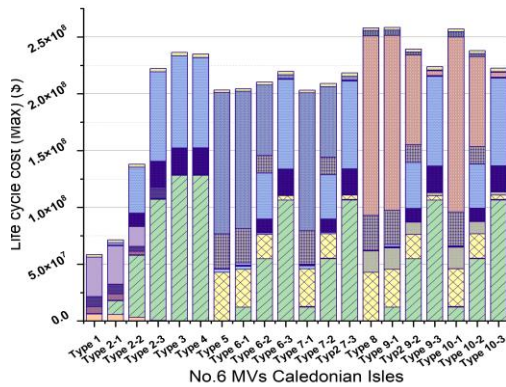

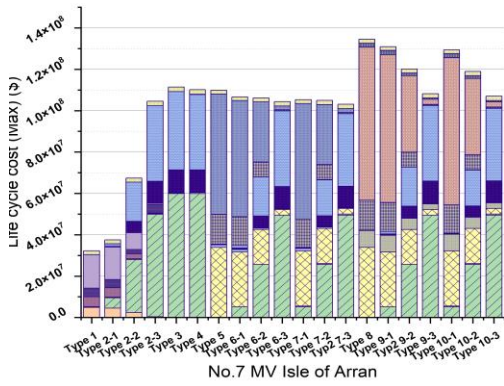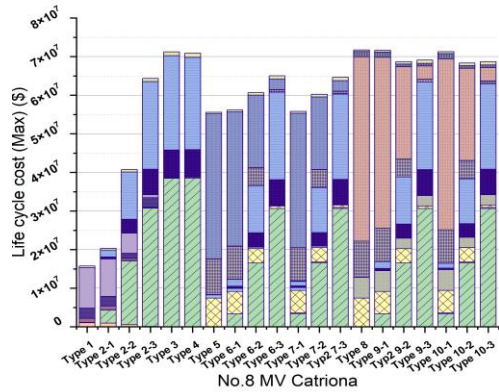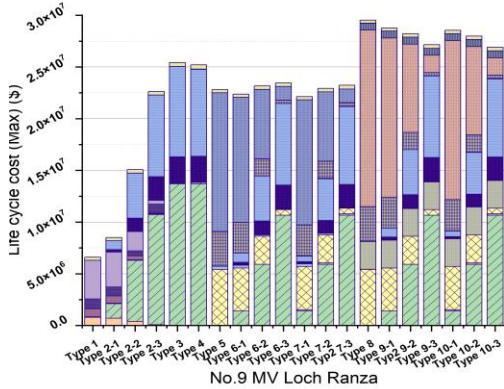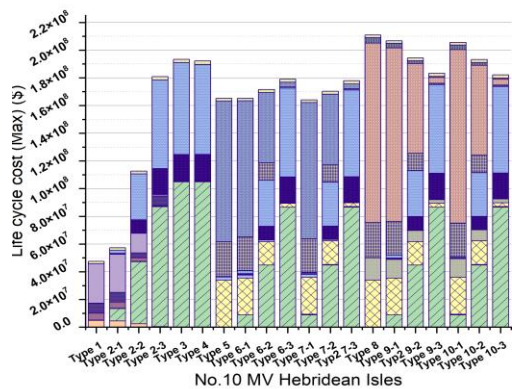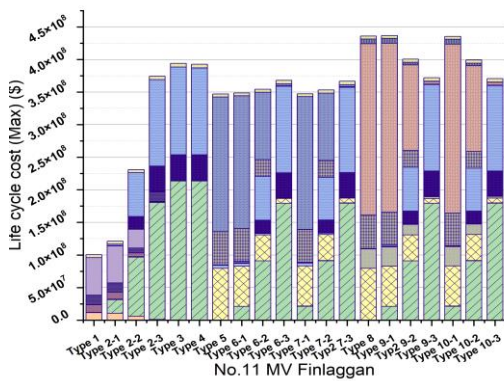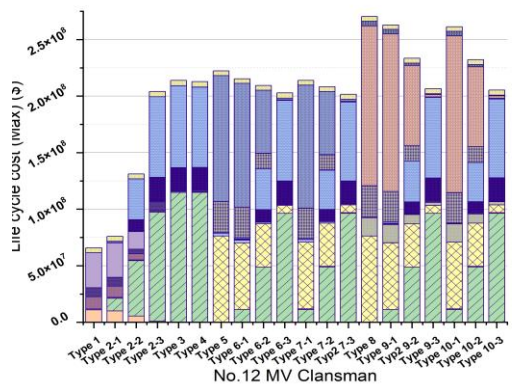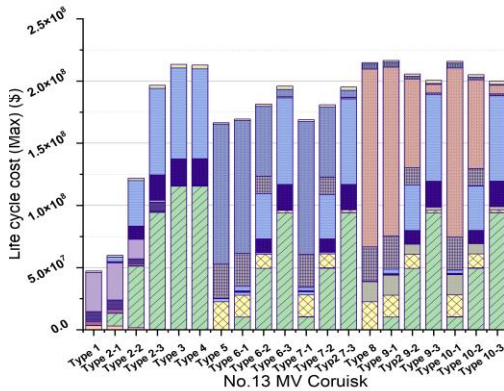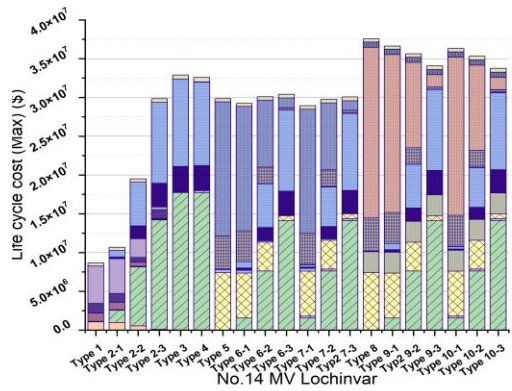



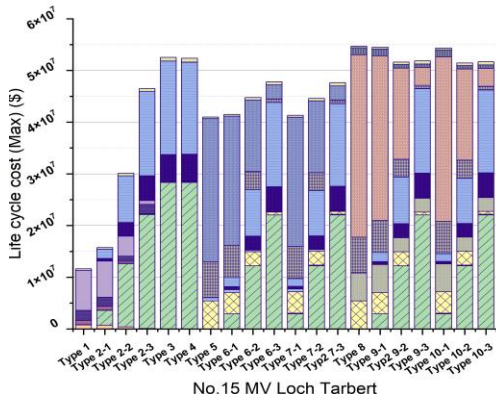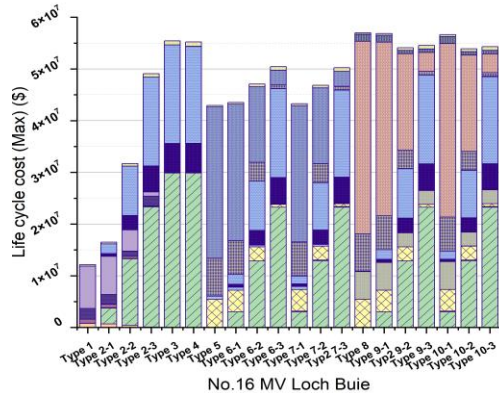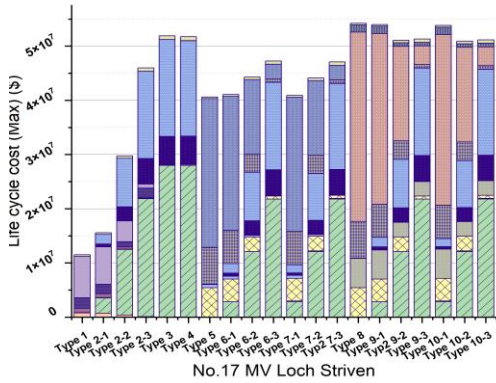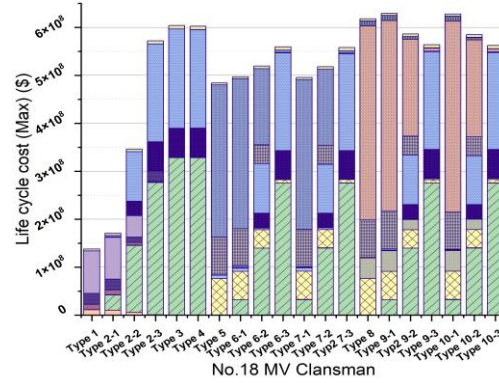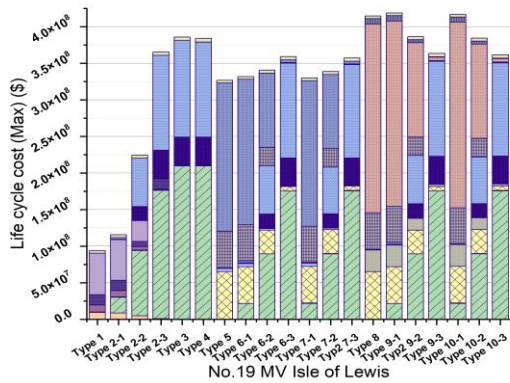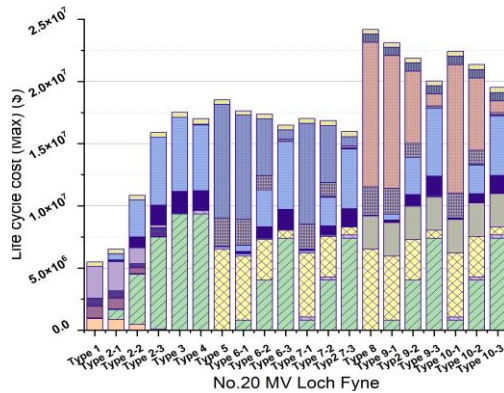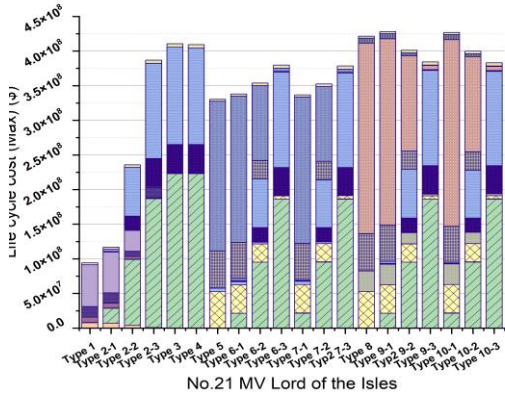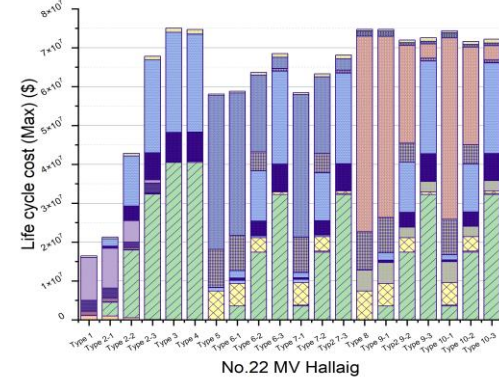

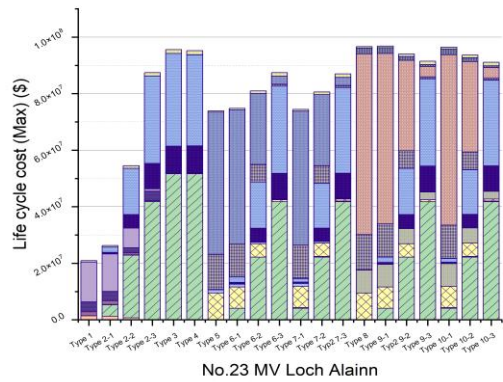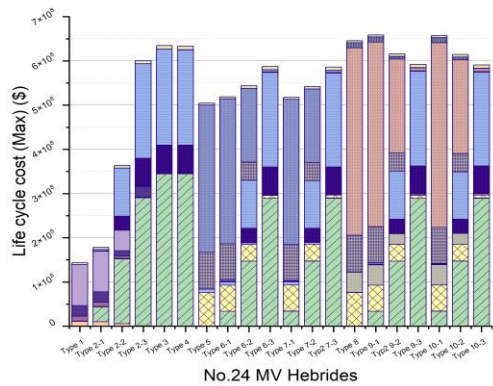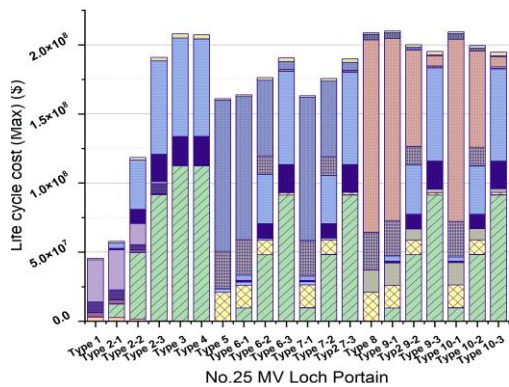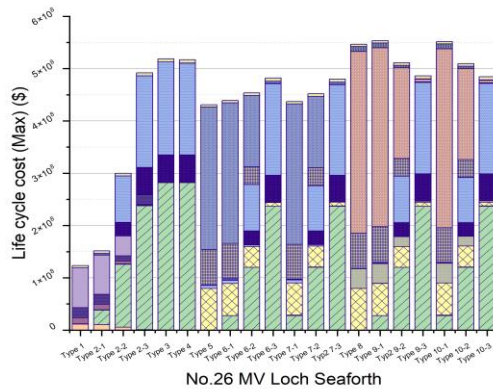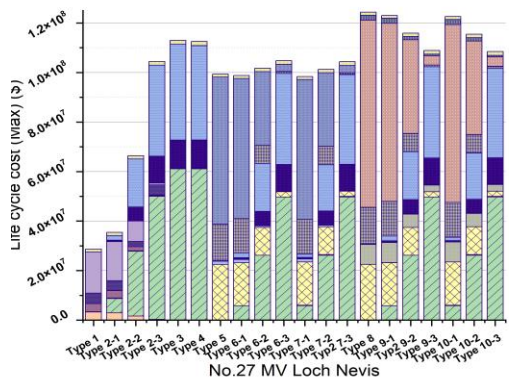

Supplement: s1 [file s1]
